# Supplementary material for: Intermediate filament network perturbation in the C. elegans intestine causes systemic dysfunctions
Source: eLife. 2023 Jun 7;12:e82333. doi: 10.7554/eLife.82333 (PMC10281669; doi:10.7554/eLife.82333)
Supplement: Figure 5—source data 1. [file elife-82333-fig5-data1.xlsx]

## Sheet: Tabelle1
Probe	AS-Sequenz	MW	AS
N2	LEVYISR	959	50-56	S55
N2	LEVYISR	959	50-56	S55
N2	FNDSLVK	902	89-95	S92
	LEVYISR	959	50-56	S55
	LVESEEG	996	380-387	S383
N2	LEVYISR	959	50-56	S55
	LVESEEG	996	380-387	S383
FK312	LEVYISR	959	50-56	S55
	FNDSLVK	902	89-95	S92
	AKLSELEAR	1096	305-313	S308
	LSELEAR	896	307-313	S308
	KLVESEEGR	1125	379-387	S383
	SSFK	548	422-425	S422
	EIKAEYDK	1074	248-255	Y253
	IYGR	588	490-493	Y491
FK312	LEVYISR	959	50-56	S55
	FNDSLVK	902	89-95	S92
	AKLSELEAR	1096	305-313	S308
	AYESELHK	1055	379-387	S383
	KLVESEEGR	1125	379-387	S383
	SSFK	548	422-425	S422
	SSFKR	705	422-426	S422
	EIKAEYDK	1074	248-255	Y253
	AEYDK	705	251-255	Y253
	AYESELHK	1055	334-341	Y335
FK312	LEVYISR	959	50-56	S55
	FNDSLVK	902	89-95	S92
	AYESELHK	1055	379-387	S383
	SSFK	548	422-425	S422
	SSFKR	705	422-426	S422
	EIKAEYDK	1074	248-255	Y253
	AYESELHK	1055	334-341	Y335
	IYGR	588	490-493	Y491
	AEYDK	705	251-255	Y253
FK312	LEVYISR	959	50-56	S55
	FNDSLVK	902	89-95	S92
	AKLSELEAR	1096	305-313	S308
	AYESELHK	1055	379-387	S383
	SSFK	548	422-425	S422
	AEYDK	706	251-255	Y253
	IYGR	588	490-493	Y491
	EIKAEYDK	1074	248-255	Y253
	AYESELHK	1055	334-341	Y335

## Sheet: Tabelle2
		Phosphopeptide Detection
Amino Acid Position (*)	Protein Domain	N2 (n=4)	sma-5(n678) (n=4)
S55	L1	4/4	4/4
S92	1B	1/4	4/4
S308	2B	0/4	3/4
S383	2B	2/4	2/4
S422	tail	0/4	4/4
Y253	2A	0/4	4/4
Y335	2B	0/4	3/4
Y491	tail	0/4	3/4
