# Supplementary material for: Intermediate filament network perturbation in the C. elegans intestine causes systemic dysfunctions
Source: eLife. 2023 Jun 7;12:e82333. doi: 10.7554/eLife.82333 (PMC10281669; doi:10.7554/eLife.82333)
Supplement: Supplementary file 1. [file elife-82333-supp1.xlsx]

## Sheet: Tabelle1
Generated strain	Background strain	Genotype	Repair oligo / construct	sgRNA 1 (PAM motif in brackets)	sgRNA 2 (PAM motif in brackets)
BOX793	BJ316	ifb-2(mib155[S2D;S5D; S7D;S16-19D])II;ifc-2a/e::yfp(kc16)X	tttgttttattttcaaaattttagcgacttcatc ATGGATGCGGTTGATTATGACATGCACAGAACCACCACAACTACAGACGATGACGACCACGGAGgtaagcacttttcttcaaatttccaacagt	ttttagcgac ttcatcatgt(CGG)	acatcctcct catcacacgg(AGG)
BJ427	BOX793	ifb-2(kc22[S2D;S5D; S7D;S16-19D;S24D;S35D])II;ifc-2a/e::yfp(kc16)X	tcggaacacagtttacataatatttcag GTGTTGACGCCGGCCATGCCG CTGAGGAGTTCGTTGCTGACG CCGAGCGCGAGAAGCAAGAGATGCAGCAGTTGAAC	aatatttcag GTGTCTCAGC(CGG)	(CCT)CTGCC GAGCGCGAGAAGCAA
BOX794	BJ316	ifb-2(mib156[S2A;S5A; S7A;S16-19A])II;ifc-2a/e::yfp(kc16)X	tttgttttattttcaaaattttagcgacttcatc ATGGCCGCGGTTGCTTATGCCATGCACAGAACCACCACAACTACAGCCGCCGCTGCGCACGGAGgtaagcacttttcttcaaatttccaacagt	Same sgRNAs as for BOX793	Same sgRNAs as for BOX793
BJ431	BOX794	ifb-2(kc26[S2A;S5A; S7A;S16-19A;S24A;S35A])II;ifc-2a/e::yfp(kc16)X	tcggaacacagtttacataatatttcag GTGTTGCTGCCGGCCATGCCG CTGAGGAGTTCGTTGCTGCTG CCGAGCGCGAGAAGCAAGAGATGCAGCAGTTGAAC	Same sgRNAs as for BJ427	Same sgRNAs as for BJ427
BJ432	BOX794	ifb-2(kc27[S2A;S5A;S7A; S16-19A;E31-A184 deleted])II;ifc-2a/e::yfp(kc16)X	tcggaacacagtttacataatatttcag GTGTTGCTGCCGGCCATGCCG CTGAGGAGTTCGTTGCTGCTG CCGAGCGCGAGAAGCAAGAGATGCAGCAGTTGAAC	Same sgRNAs as for BJ427	Same sgRNAs as for BJ427
BOX827	BJ316	ifb-2(mib169[S2-M43 deleted])II;ifc-2a/e::yfp(kc16)X	tttgttttattttcaaaattttagcgacttcatc ATGCAGCAGTTGAACTCTCGTCTTGAAGTTTACATCAGCCGTGTCCGTCA ACTTGAGGATC	ttttagcgac ttcatcatgt(CGG)	(CCT)TGAAG TTTACATCAGCCGTG
BOX540	N2	ifd-1(mib95[mCherry::ifd-1])X	aaaacaatatcgttcacatcattttgattccaggctttaaaaaATGTCCAAGGGAGAGGAGGACAACATGGCCATCATCAAGGAGTTCATGCGTTTCAAGGTCCACATGGAGGGATCAGTCAACGGACACGAGTTCGAGATCGAGGGAGAGGGAGAGGGACGTCCATACGAGGGAACCCAAACCGCCAAGCTCAAGgtaagtttaaacatatatatactaactaaccctgattatttaaattttcagGTCACCAAGGGAGGACCACTCCCATTCGCCTGGGACATCCTCTCCCCACAATTCATGTACGGATCAAAGGCCTACGTCAAGCACCCAGCCGACATCCCAGACTACCTCAAGCTCTCCTTCCCAGAGGGATTCAAGTGGGAGCGTGTCATGAA…	(cca)ggctttaaaaaATGAGCAAA	ACGTATCGTACAGTCATTGA(tgg)
